# Supplementary material for: Zn/Cd ratios and cadmium isotope evidence for the classification of lead-zinc deposits
Source: PubMed Central journal article supplement (PMC4848528; doi:10.1038/srep25273), 2016-04-28
Supplement: srep25273-s1.pdf [file srep25273-s1.pdf]

# Zn/Cd ratios and cadmium isotope evidence for the classification of lead-zinc deposits

**Hanjie Wen<sup>1</sup>, Chuanwei Zhu<sup>1</sup>, Yuxu Zhang<sup>1</sup>, Christophe Cloquet<sup>2</sup>, Haifeng Fan<sup>1</sup>,  
Shaohong Fu<sup>1</sup>**

<sup>1</sup> State Key Laboratory of Ore Deposit Geochemistry (SKLOGD), Institute of Geochemistry, Chinese Academy of Sciences, Guiyang, 550002, China

<sup>2</sup> Centre de Recherches Petrographique et Geochimiques, CNRS/UMR 7358, 15, Rue Notre-Dame-Pauvres, B. P. 20, 54501, Vandoeuvre-les-Nancy Cedex, France

## ***Section 1. Ore deposit geology***

Nine Pb-Zn deposits were chosen to investigate Cd isotopic compositions and relevant elemental ratios. These were divided into three categories: high-temperature systems, low-temperature systems and exhalative systems. The high-temperature system includes a porphyry deposit (Dabaoshan), magmatic hydrothermal deposit (Shagou), skarn deposit (Bayinnuoer) and VMS deposit (Gacun), all of which are closely associated with magmatism and formed at temperatures of 200–250 °C (Han et al., 2014; Li et al., 2012; Sun, 1992; Tornos et al., 2015). Low-temperature systems refer to MVT deposits, including the Fule, Tianbaoshan, Jinding and Dadongla Pb-Zn deposits, typically formed at temperatures < 200 °C (Zaw et al., 2007). Finally, exhalative systems are represented by the Langshan SEDEX deposit. Ore deposit geology for these deposits are provided in Table 1 as following.

**Table 1-1** Characteristics of selected Pb-Zn deposits

| Deposit                 | Fule                                              | Tianbaoshan                        | Jinding                                                                | Dadongla                                   |
|-------------------------|---------------------------------------------------|------------------------------------|------------------------------------------------------------------------|--------------------------------------------|
| Deposit type            | MVT                                               | MVT                                | MVT                                                                    | MVT                                        |
| Province/tectonic unit  | E. Guizhou, Yangtze Craton                        | W.Sichuan, Yangtze Craton          | W.Yunnan, Sanjiang Fold System                                         | E. Guizhou, Yangtze Craton                 |
| Tonnage(Mt)             | 0.38 (Mt): combined (Zn+Pb+Cd+Ge+Ga )             | 2.6 (Mt): combined (Zn+Pb+Ag)      | 200 Mt (ore): combined (Zn+Pb+Ag)                                      | 3.2×10 <sup>-3</sup> (Mt): combined(Zn+Hg) |
| Grade                   | 4.51% Zn, 0.56% Pb, 0.13% Cd, 0.01% Ge, 0.007% Ga | 10.4% Zn, 1.4% Pb, 93.6 g/t Ag     | 6.08% Zn, 1.29% Pb, 1-20 g/t Ag                                        | No data                                    |
| Orebody morphology      | Massive stratiform, lens-shaped                   | Massive, disseminated              | Tabular, vein, massive stratiform                                      | disseminated, massive                      |
| Host lithology          | Early Permian, Maikou Fm.(dolomite, limestone)    | Dengying Fm.(dolomite, limestone)  | Early Cretaceous, Jinxing Fm.(sandstone, limestone) Tertiary sediments | Early Cambrian, Aoxi Fm.(dolomite)         |
| Mineralisation age (Ma) | 108-198                                           | Earlier than 166-156               | 72±4.4                                                                 | 101±5.5                                    |
| ore-forming temperature | 160 °C-220 °C (Zn-Pb ore related )                | 120 °C-160 °C (Zn-Pb ore related ) | 100 °C-210 °C                                                          | 130 °C-170 °C                              |
| Salinity                | 4.5-11 wt%                                        | 6.2-7.4 wt%                        | 5-10 wt%                                                               | 15-25 wt%                                  |

**Table 1-2** Characteristics of selected Pb-Zn deposits

| Deposit                 | Dabaoshan                                                   | Shagou                                                              | Baiyinnuo'er                                     | Gacun                                              | langshan                                       |
|-------------------------|-------------------------------------------------------------|---------------------------------------------------------------------|--------------------------------------------------|----------------------------------------------------|------------------------------------------------|
| Deposit type            | Porphyry type                                               | magmatic hydrothermal type                                          | Skarn type                                       | VMS type                                           | Sedex                                          |
| Province/tectonic unit  | N.Guangzhou, Cathaysia Block                                | NW.Henan, North China craton                                        | E.Inner Mongolia, North China craton             | W.Sichuan, Sanjiang Fold System                    | northern margin of North China craton          |
| Tonnage(Mt)             | 2.1 (Mt): combined (Cu+Zn+Pb+W)                             | 1.54 (Mt): combined (Ag-Pb-Zn)                                      | 2.44 (Mt): combined (Zn+Pb+Ag)                   | 4 (Mt): combined (Cu+Zn+Pb+Ag+Au)                  | 6 (Mt): combined (Zn+Pb)                       |
| Grade                   | 0.86% Cu, 12% Zn, 1.77% Pb, 0.12% WO <sub>3</sub>           | 13.24% Pb, 4.31% Zn, 767 g/t Ag                                     | 5.73-8.67% Zn, 1.72-2.09%, Ag (1027 t)           | 0.44% Cu, 5.4% Zn, 3.7% Pb, 160 g/t Ag, 0.3 g/t Au | 3.95% Zn, 1.35% Pb                             |
| Orebody morphology      | Massive stratiform, lens-shaped                             | Disseminated, massive                                               | Disseminated                                     | Massive stratiform                                 | Massive stratiform                             |
| Host lithology          | Middle Devonian-Carboniferous, Donggangling Fm. (limestone) | Early Archeozoic-Proterozoic, Taihua Gr and Xionger Gr. (volcanics) | Early Permian Huangliang Fm. (Limestone, marble) | Late Triassic, Gacun Fm. (volcanics)               | Mesoproterozoic Zhaertaishan Group, (dolomite) |
| Mineralisation age (Ma) | 166±3.0                                                     | 140.0±1.0                                                           | 244.5±0.9                                        | 204±14                                             | 1400-1600                                      |
| ore-forming temperature | 280°C-320°C (Zn-Pb ore related)                             | 194°C-240°C (Zn-Pb ore related)                                     | 197°C-373°C                                      | 122°C-250°C (Zn-Pb ore related)                    | 160°C-320°C (Zn-Pb ore related)                |
| Salinity                | 2-17 wt%                                                    | 1.9-10.9 wt%                                                        | 1.9-10.9 wt%                                     | 0.5-10.7 wt%                                       | 8-15 wt%                                       |

## ***Section 2. Chemistry and mass spectrometry***

A total of 70 sphalerite samples from these deposits were collected, separated and analyzed for Zn and Cd concentrations and Cd isotopes. The Zn and Cd concentrations were determined by Inductively Coupled Plasma Optical Emission Spectrometry (ICP-OES, Varian Vista MPX) at the State Key Laboratory of Ore Deposit Geochemistry, at the Institute of Geochemistry, Chinese Academy of Sciences

After the Cd concentrations in the powder samples were determined, an aliquot that would have contained more than 100 ng Cd was taken from each sample and oxidized using a 3 ml of concentrated HNO<sub>3</sub> at 100 °C for at least 16 h, until the

sample was completely dissolved. A procedure using an anion exchange resin column, which has been described by (Cloquet et al., 2005; Wen et al., 2015; Zhu et al., 2013), was used to separate the Cd from the matrix. The procedure that was used to separate the Cd from the matrix is shown in **Table 2**. The method gave a mean Cd recovery of 99.8%. Elements that could potentially interfere with the determination of the Cd isotopes, such as Sn, In, Zn, and Pb, were found at concentrations that were negligible relative to the Cd concentrations.

**Table 2** Summary of the Cd separation Chemistry

| Procedure   | Reagent                 | volume (ml) |
|-------------|-------------------------|-------------|
| Resin       | AG-MP-1M (100-200 mesh) | 3           |
| Clean       | 0.0012 mol/L HCl        | 25          |
| Condition   | 2 mol/L HCl             | 20          |
| Load sample | 2 mol/L HCl             | 2           |
| Wash        | 2 mol/L HCl             | 10          |
| Wash        | 0.3 mol/L HCl           | 30          |
| Wash        | 0.06 mol/L HCl          | 20          |
| Wash        | 0.012 mol/L HCl         | 10          |
| Collect Cd  | 0.0012 mol/L HCl        | 20          |

The Cd isotope measurements were performed at the State Key Laboratory of Ore Deposit Geochemistry, at the Institute of Geochemistry, Chinese Academy of Sciences, using a Neptune Plus multi collector ICP-MS instrument. Aliquots of the digested samples were introduced into the instrument using a cyclonic chamber system with a perfluoroalkoxy alkane pneumatic nebulizer in free aspiration mode. The samples and bracketing reference solutions were run in two blocks of 15 measurement cycles for each m/z ratio. The system typically generated a total Cd signal of about 57 V/ppm at an uptake rate of about 100  $\mu\text{L}/\text{min}$ , which corresponded to ca. 75 ng Cd analyzed. The nebulizer and spray chamber were rinsed after each run with 0.6 M  $\text{HNO}_3$  until the signal intensity reached the original background level

(generally after 3 min).

The standard–sample bracketing method was used to calculate delta values. The concentrations in the samples and reference Cd samples (the bracketing Cd reference was obtained from Spex) were matched to within 10%. The analyses were conducted in static mode. The blank solution signal was subtracted from each of the measured masses. Instrumental drift was corrected by averaging the ratios measured in the bracketing reference solutions. Only sections with linear or smooth drifts for the reference solution were considered and used to calculate the delta values for the samples. A Cd solution (Spex) was used as an internal reference standard. A fractionated Cd metal sample (a Münster Cd solution from Nancy University) was used as a second reference material. Repeated measurements of the Münster Cd solution gave a  $\delta^{114/110}\text{Cd}$  value of  $4.47\text{‰} \pm 0.08\text{‰}$  (mean  $\pm 2\sigma$ ), which was identical to the previously recommended Cd isotopic value for the solution,  $4.48\text{‰}$  (Cloquet et al., 2005).  $\delta$  notation, as defined by the relationship shown below, was used to present the results.

$$\delta^{x/110}\text{Cd} (\text{‰}) = [({}^x\text{Cd}/{}^{110}\text{Cd})_{\text{sample}}/({}^x\text{Cd}/{}^{110}\text{Cd})_{\text{std}} - 1] \times 1000\text{‰},$$

where  ${}^x\text{Cd}$  means the  ${}^{111}\text{Cd}$ ,  ${}^{112}\text{Cd}$ ,  ${}^{113}\text{Cd}$ , or  ${}^{114}\text{Cd}$  isotope.

The  $\delta^{112/110}\text{Cd}$  vs  $\delta^{114/110}\text{Cd}$  diagram (Fig. 1) shows that the Cd isotopic compositions of all sphalerite samples fall within the error for the equilibrium theoretical mass fractionation lines, indicating that isobaric interference has been efficiently removed by the chemical purification (matrix interference) and by the isobaric interference correction (e.g., Sn interference) during the measurements.

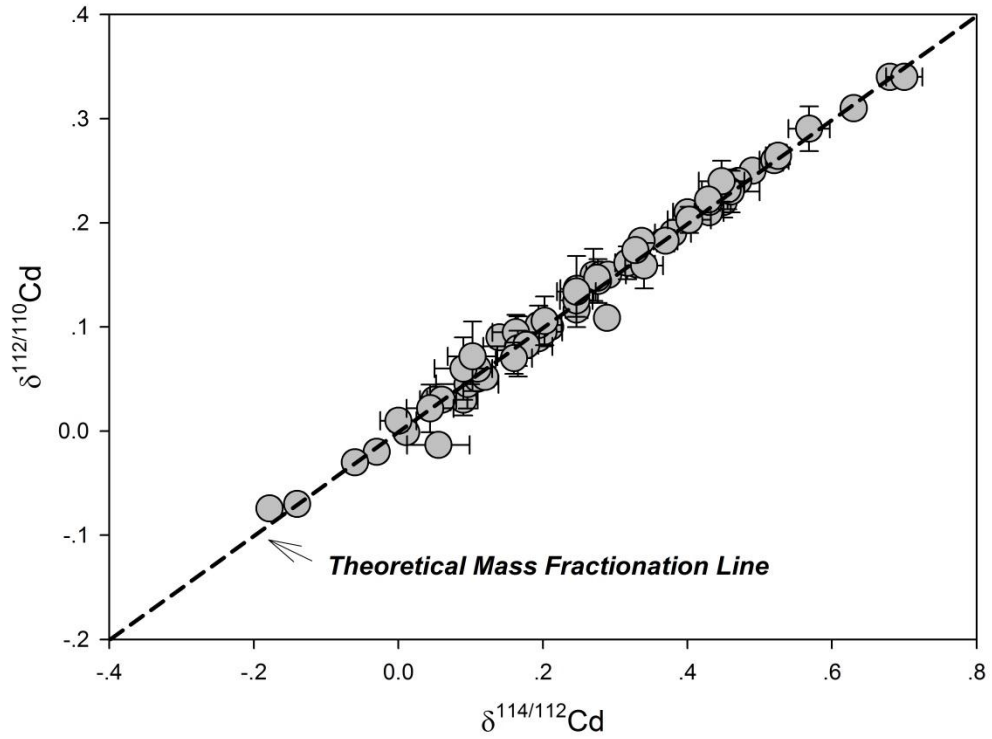

**Figure 1** A  $\delta^{114/110}\text{Cd}_{\text{sp}}$  vs  $\delta^{112/110}\text{Cd}$  diagram for the samples from the studied deposits, and all samples are within the error of the theoretical mass fractionation line (TMFL).

### *Section 3. Dataset of the studied deposits*

**Table 3** The analytical data with elemental analyses, elemental enrichment ratios (Zn/Cd) and isotopic values from both the studied deposits and reference data

| Sample No.                        | Sample type       | Cd<br>(ppm) | Zn<br>(%) | Fe<br>(ppm) | Zn/Cd | $\delta^{114/110}\text{Cd}$<br>( $2\sigma$ , ‰) | $\delta^{112/110}\text{Cd}$<br>( $2\sigma$ , ‰) |
|-----------------------------------|-------------------|-------------|-----------|-------------|-------|-------------------------------------------------|-------------------------------------------------|
| <b>Low-temperature system</b>     |                   |             |           |             |       |                                                 |                                                 |
| <i>Dadongla MVT Pb-Zn deposit</i> |                   |             |           |             |       |                                                 |                                                 |
| DDL13-2                           | Sp, Reddish-brown | 26215       | 62.0      |             | 24    | $0.27 \pm 0.02$                                 | $0.15 \pm 0.05$                                 |
| DDL13-6                           | Sp, Reddish-brown | 16536       | 60.2      |             | 36    | $0.28 \pm 0.04$                                 | $0.15 \pm 0.01$                                 |
| DDL14-3                           | Sp, Reddish-brown | 22857       | 58.7      |             | 26    | $0.33 \pm 0.05$                                 | $0.16 \pm 0.02$                                 |
| DDL14-3                           | Sp, Reddish-brown | 19090       | 59.2      |             | 31    | $0.33 \pm 0.01$                                 | $0.16 \pm 0.02$                                 |
| DDL14-5                           | Sp, Reddish-brown | 20073       | 65.1      |             | 32    | $0.49 \pm 0.01$                                 | $0.25 \pm 0.01$                                 |
| <i>Jinding MVT Pb-Zn deposit</i>  |                   |             |           |             |       |                                                 |                                                 |
| JD-13                             | Sp, Black         | 3208        | 54.1      |             | 169   | $0.45 \pm 0.02$                                 | $0.22 \pm 0.03$                                 |
| JD-13                             | Sp, Buff          | 3184        | 60.3      |             | 189   | $0.68 \pm 0.01$                                 | $0.34 \pm 0.02$                                 |
| JD2-10                            | Sp, Buff          | 5496        | 60.6      |             | 110   | $0.09 \pm 0.04$                                 | $0.03 \pm 0.03$                                 |

|        |           |       |      |  |     |           |           |
|--------|-----------|-------|------|--|-----|-----------|-----------|
| JD3-16 | Sp, Black | 22826 | 54.6 |  | 24  | 0.14±0.02 | 0.09±0.02 |
| JD3-9  | Sp, Black | 4805  | 66.3 |  | 138 | 0.33±0.03 | 0.16±0.02 |

*Fule MVT Pb-Zn deposit*

|         |                   |       |      |     |       |           |           |
|---------|-------------------|-------|------|-----|-------|-----------|-----------|
| SBFL-16 | Sp, Mixed         | 22151 | 55.2 | 369 | 24.9  | 0.40±0.04 | 0.21±0.01 |
| SBFL-16 | Sp, Mixed         | 22064 | 55.3 | 419 | 25.0  | 0.38±0.05 | 0.19±0.01 |
| SBFL-22 | Sp, Black         | 14714 | 57.9 | 970 | 39.3  | 0.06±0.04 | 0.03±0.01 |
| SBFL-22 | Sp, Reddish-brown | 9083  | 62.6 | 448 | 69.0  | 0.52±0.04 | 0.26±0.02 |
| SBFL-23 | Sp, Black         | 15046 | 60.7 | 706 | 40.3  | 0.28±0.03 | 0.15±0.01 |
| SBFL-23 | Sp, Reddish-brown | 13735 | 60.9 | 685 | 44.3  | 0.43±0.04 | 0.21±0.01 |
| SBFL-24 | Sp, Black         | 18479 | 55.3 | 547 | 29.9  | 0.33±0.01 | 0.17±0.01 |
| SBFL-24 | Sp, Reddish-brown | 16783 | 62.5 | 365 | 37.2  | 0.47±0.01 | 0.24±0.01 |
| SBFL-24 | Sp, Black         | 19532 | 59.2 | 450 | 30.3  | 0.29±0.05 | 0.15±0.01 |
| SBFL-25 | Sp, Black         | 18645 | 51.7 | 446 | 27.7  | 0.21±0.02 | 0.10±0.02 |
| SBFL-26 | Sp, Black         | 34981 | 59.5 | 395 | 17.0  | 0.46±0.08 | 0.23±0.04 |
| SBFL-26 | Sp, Black         | 34757 | 59.4 | 384 | 17.1  | 0.43±0.03 | 0.22±0.01 |
| FL-01   | Sp, Reddish-brown | 5238  | 62.8 | 424 | 119.9 | 0.70±0.05 | 0.34±0.01 |
| FL-04   | Sp, Reddish-brown | 7930  | 60.7 | 492 | 76.6  | 0.63±0.02 | 0.31±0.01 |

*Fule MVT Pb-Zn deposit*

|         |                   |      |      |       |       |           |           |
|---------|-------------------|------|------|-------|-------|-----------|-----------|
| HL-6-2  | Sp, Black         | 4524 | 42.5 | 13474 | 93.8  | 0.57±0.06 | 0.29±0.04 |
| HL-6-3  | Sp, Black         | 2798 | 45.6 | 13163 | 163.1 | 0.25±0.03 | 0.12±0.01 |
| HL-6-4  | Sp, Black         | 2745 | 42.8 | 12463 | 156.1 | 0.46±0.01 | 0.23±0.04 |
| HL-8-3  | Sp, Black         | 2534 | 44.1 | 12297 | 174.2 | 0.45±0.06 | 0.24±0.04 |
| HL-8-4  | Sp, Buff          | 2415 | 48.5 | 3632  | 200.7 | 0.43±0.02 | 0.22±0.01 |
| HL-8-4  | Sp, Black         | 2608 | 46.6 | 11428 | 178.8 | 0.53±0.03 | 0.26±0.02 |
| HL-8-5  | Sp, Black         | 1998 | 45.6 | 11004 | 228.1 | 0.19±0.02 | 0.09±0.01 |
| HL-8-10 | Sp, Black         | 4266 | 43.5 | 13495 | 101.9 | 0.10±0.09 | 0.05±0.05 |
| HL-6-3  | Sp, Black         | 2798 | 45.1 | 13129 | 161.1 | 0.20±0.05 | 0.10±0.02 |
| HL-8-16 | Sp, Buff          | 3100 | 39.3 | 8430  | 126.6 | 0.17±0.10 | 0.08±0.06 |
| HL-8-13 | Sp, Black         | 3348 | 41.9 | 13304 | 125.0 | 0.19±0.06 | 0.10±0.04 |
| HL-7-3  | Sp, Reddish-brown | 4270 | 49.5 | 8103  | 115.9 | 0.16±0.06 | 0.09±0.03 |
| HL-7-2  | Sp, Black         | 3488 | 44.8 | 9375  | 128.5 | 0.17±0.02 | 0.08±0.03 |
| HL-7-25 | Sp, Black         | 3273 | 46.3 | 12168 | 141.3 | 0.11±0.02 | 0.05±0.01 |
| HL-7-2  | Sp, Reddish-brown | 4113 | 48.5 | 8546  | 117.8 | 0.12±0.02 | 0.05±0.02 |
| HL-7-26 | Sp, Black         | 3273 | 40.2 | 8567  | 122.9 | 0.01±0.01 | 0.00±0.01 |
| HL-7-6  | Sp, Black         | 3445 | 46.6 | 12437 | 135.4 | 0.18±0.03 | 0.08±0.01 |
| HL-7-23 | Sp, Black         | 3354 | 45.9 | 12512 | 136.9 | 0.37±0.03 | 0.18±0.02 |
| HL-7-22 | Sp, Black         | 2474 | 42.7 | 10397 | 172.5 | 0.28±0.00 | 0.14±0.04 |
| HL-7-8  | Sp, Black         | 3591 | 45.3 | 9715  | 126.3 | 0.25±0.05 | 0.14±0.00 |
| HL-7-19 | Sp, Reddish-brown | 3091 | 48.7 | 11015 | 157.6 | 0.34±0.02 | 0.18±0.00 |
| HL-7-19 | Sp, Black         | 2721 | 45.2 | 12686 | 166.2 | 0.32±0.03 | 0.16±0.03 |
| HL-7-1  | Sp, Black         | 4296 | 44.9 | 8540  | 104.5 | 0.34±0.05 | 0.16±0.04 |
| HL-7-3  | Sp, Black         | 4402 | 44.7 | 8964  | 101.6 | 0.28±0.02 | 0.15±0.01 |
| HL-7-1  | Sp, Reddish-brown | 4111 | 48.4 | 7958  | 117.7 | 0.25±0.05 | 0.13±0.03 |
| HL-7-10 | Sp, Black         | 3320 | 46.9 | 10554 | 141.4 | 0.25±0.05 | 0.13±0.07 |

|         |           |      |      |       |       |           |           |
|---------|-----------|------|------|-------|-------|-----------|-----------|
| HL-8-16 | Sp, Black | 3058 | 36.9 | 7874  | 120.7 | 0.20±0.02 | 0.11±0.05 |
| HL-8-16 | Sp, Black | 4887 | 46.7 | 12746 | 95.5  | 0.40±0.06 | 0.20±0.03 |

### High-temperature system

#### *Bayinnuoer skarn deposit*

|         |           |      |      |  |     |            |            |
|---------|-----------|------|------|--|-----|------------|------------|
| BYNE-1  | Sp, Black | 2521 | 54.7 |  | 217 | -0.14±0.01 | -0.07±0.01 |
| BYNE-2  | Sp, Buff  | 2627 | 58.5 |  | 223 | -0.03±0.02 | -0.02±0.01 |
| BYNE-3  | Sp, Buff  | 2483 | 57.9 |  | 233 | -0.06±0.02 | -0.03±0.01 |
| BYNEr-3 | Sp, Buff  | 2410 | 55.7 |  | 231 | 0.11±0.01  | 0.06±0.01  |

#### *Gacun VMS deposit*

|         |                   |      |      |  |     |           |           |
|---------|-------------------|------|------|--|-----|-----------|-----------|
| Gacun-1 | Sp, Reddish-brown | 2926 | 62.2 |  | 213 | 0.05±0.00 | 0.03±0.02 |
| Gacun-2 | Sp, Reddish-brown | 3041 | 51.5 |  | 169 | 0.16±0.05 | 0.07±0.03 |
| Gacun-3 | Sp, Reddish-brown | 2828 | 57.8 |  | 204 | 0.00±0.05 | 0.01±0.02 |
| Gacun-4 | Sp, Black         | 3476 | 63.9 |  | 184 | 0.05±0.04 | 0.03±0.02 |

#### *Shagou magmatic hydrothermal deposit*

|       |           |      |      |  |     |           |           |
|-------|-----------|------|------|--|-----|-----------|-----------|
| SG-92 | Sp, Black | 2688 | 51.3 |  | 191 | 0.10±0.04 | 0.06±0.03 |
| SG-96 | Sp, Buff  | 4126 | 63.6 |  | 154 | 0.11±0.02 | 0.06±0.01 |
| SG-96 | Sp, Black | 3819 | 61.0 |  | 160 | 0.06±0.04 | 0.03±0.02 |
| SG-96 | Sp, Buff  | 3856 | 59.9 |  | 155 | 0.09±0.08 | 0.06±0.06 |

#### *Dabaoshan porphyry deposit*

|        |          |      |      |  |     |           |           |
|--------|----------|------|------|--|-----|-----------|-----------|
| DBS-13 | Sp, Buff | 1316 | 26.7 |  | 203 | 0.04±0.06 | 0.02±0.05 |
|--------|----------|------|------|--|-----|-----------|-----------|

### Exhalative system

#### *Langshan SEDEX deposit*

|       |          |     |      |  |     |            |            |
|-------|----------|-----|------|--|-----|------------|------------|
| LS-1  | Sp, Buff | 996 | 34.2 |  | 343 | -0.18±0.01 | -0.07±0.01 |
| LS-2  | Sp, Buff | 904 | 31.4 |  | 347 | 0.10±0.07  | 0.07±0.07  |
| TYK-1 | Sp, Buff | 595 | 23.4 |  | 393 | 0.33±0.01  | 0.17±0.01  |
| TYK-8 | Sp, Buff | 34  | 1.1  |  | 316 | 0.06±0.09  | -0.01±0.01 |

### Seafloor hydrothermal sulfides (Schmitt et al., 2009)

|                      |                     |      |     |  |     |            |           |
|----------------------|---------------------|------|-----|--|-----|------------|-----------|
| JSPX-1               | Sp, Buff            | 31   | 1.1 |  | 368 | 0.29±0.02  | 0.11±0.01 |
| Alv-4053-M1          | Sphalerite+pyrite   | 1174 | 25  |  | 211 | -0.23±0.01 |           |
| #A1 (bottom chimney) |                     |      |     |  |     |            |           |
| Alv-4053-M1          | Sphalerite+pyrite   | 259  | 13  |  | 510 | -0.38±0.02 |           |
| #A5 (top chimney)    |                     |      |     |  |     |            |           |
| Alv-4053-M2          | Euhedral sphalerite |      |     |  |     | 0.46±0.01  |           |
| -a (extinct)         |                     |      |     |  |     |            |           |
| Alv-4057-M1          | Sphalerite+pyrite   | 611  | 23  |  | 371 | 0.09±0.01  |           |
| #A1 (bottom chimney) |                     |      |     |  |     |            |           |
| Alv-4057-M1          | Sphalerite+pyrite   | 714  | 27  |  | 371 | 0.11±0.01  |           |
| #A4 (top chimney)    |                     |      |     |  |     |            |           |
| Alv-4059-M3          | Pyrite+sphalerite   |      |     |  |     | 0.11±0.01  |           |



## Reference

- Cloquet, C., Rouxel, O., Carignan, J., and Libourel, G., 2005, Natural Cadmium isotopic variations in eight geological reference materials (NIST 2711, BCR 176, GSS 1, GXR 1, GXR 2, GSD 12, Nod P1, Nod A1) and anthropogenic samples, measured by MC-ICP MS: *Geost. Geoan. Res.*, v. 29, p. 95-106.
- Han, J.-S., Yao, J.-M., Chen, H.-Y., Deng, X.-H., and Ding, J.-Y., 2014, Fluid inclusion and stable isotope study of the Shagou Ag–Pb–Zn deposit, Luoning, Henan province, China: Implications for the genesis of an orogenic lode Ag–Pb–Zn system: *Ore Geology Reviews*, v. 62, no. 0, p. 199-210.
- Li, C.-Y., Zhang, H., Wang, F.-Y., Liu, J.-Q., Sun, Y.-L., Hao, X.-L., Li, Y.-L., and Sun, W., 2012, The formation of the Dabaoshan porphyry molybdenum deposit induced by slab rollback: *Lithos*, v. 150, no. 0, p. 101-110.
- Schmitt, A. D., Galer, S. J. G., and Abouchami, W., 2009, Mass-dependent cadmium isotopic variations in nature with emphasis on the marine environment: *Earth and Planetary Science Letters*, v. 277, no. 1-2, p. 262-272.
- Sun, H., 1992, A general review of volcanogenic massive sulphide deposits in China: *Ore Geology Reviews*, v. 7, no. 1, p. 43-71.
- Tornos, F., Peter, J. M., Allen, R., and Conde, C., 2015, Controls on the siting and style of volcanogenic massive sulphide deposits: *Ore Geology Reviews*, v. 68, no. 0, p. 142-163.
- Wen, H., Zhang, Y., Cloquet, C., Zhu, C., Fan, H., and Luo, C., 2015, Tracing sources of pollution in soils from the Jinding Pb–Zn mining district in China using cadmium and lead isotopes: *Applied Geochemistry*, v. 52, p. 147-154.
- Zaw, K., Peters, S. G., Cromie, P., Burrett, C., and Hou, Z., 2007, Nature, diversity of deposit types and metallogenic relations of South China: *Ore Geology Reviews*, v. 31, no. 1–4, p. 3-47.
- Zhu, C. W., Wen, H. J., Zhang, Y. X., Fan, H. F., Fu, S. H., Xu, J., and Qin, T. R., 2013, Characteristics of Cd isotopic compositions and their genetic significance in the lead-zinc deposits of SW China: *Science China-Earth Sciences*, v. 56, no. 12, p. 2056-2065.
- Zhu, C. W., Wen, H. J., Zhang, Y. X., Fan, H. F., and H. F., 2016, Cadmium and sulfur isotopic compositions of the Tianbaoshan Zn–Pb–Cd deposit, Sichuan Province, China: *Ore Geology Reviews*, v. 76, p. 152–162
